# Supplementary material
Source: PubMed Central journal article supplement (PMC3250109)
Supplement: supp_mol.111.074393_Li_Supplemental_Tables1_74393.pdf [file supp_mol.111.074393_Li_Supplemental_Tables1_74393.pdf]

The role of CYP3A4 mRNA transcript with shortened 3'-UTR in hepatocyte differentiation, liver development, and response to drug induction

Dan Li, Roger Gaedigk, Steven N. Hart, J Steven Leeder, and Xiao-bo Zhong

Molecular Pharmacology

**Supplemental Table 1.** Slope and R<sup>2</sup> of standard curves and PCR efficiency.

| Primer set                                           | Slope       | R <sup>2</sup> | PCR Efficiency |
|------------------------------------------------------|-------------|----------------|----------------|
| CYP3A4 transcript with canonical 3'-UTR              | -3.33 ±0.20 | 0.9996 ±0.0006 | 1.00 ±0.08     |
| CYP3A4 transcripts with canonical and shorter 3'-UTR | -3.27 ±0.15 | 0.9982 ±0.0016 | 1.03 ±0.07     |
| CYP3A4 transcript with intron-6 retention            | -3.25 ±0.15 | 0.9959 ±0.0001 | 1.03 ±0.07     |
| GAPDH                                                | -3.42 ±0.26 | 0.9965 ±0.0010 | 0.97 ±0.10     |
| ACTB                                                 | -3.22 ±0.16 | 0.9972 ±0.0012 | 0.99 ±0.09     |

Mean ± S.D. (n=3)

$$\text{PCR efficiency} = 10^{(-1/\text{slope})} - 1$$

GAPDH: glyceraldehyde 3-phosphate dehydrogenase (reference gene 1)

ACTB: actin, beta (reference gene 2)

**Supplemental Table 2.** Fold changes of expression of the CYP3A4 mRNA transcripts in HepaRG cells during hepatocyte differentiation

**2A.** CYP3A4 transcript with canonical 3'-UTR

| Sample Name # | Cq*   | $\Delta Cq$ ^ | $\Delta\Delta Cq$<br>(Minus Undif HepaRG) | Fold of Change<br>(Power) |
|---------------|-------|---------------|-------------------------------------------|---------------------------|
| Undif HepaRG1 | 21.58 | 2.18          | -0.47                                     | 1.39                      |
| Undif HepaRG2 | 22.81 | 2.95          | 0.30                                      | 0.81                      |
| Undif HepaRG3 | 22.65 | 2.90          | 0.25                                      | 0.84                      |
|               |       |               | Mean $\pm$ S.D.                           | 1.0 $\pm$ 0.3             |
| Diff HepaRG1  | 21.96 | 1.20          | -1.45                                     | 2.73                      |
| Diff HepaRG2  | 23.33 | 2.34          | -0.31                                     | 1.24                      |
| Diff HepaRG3  | 21.88 | 0.66          | -1.99                                     | 3.97                      |
|               |       |               | Mean $\pm$ S.D.                           | 2.6 $\pm$ 1.4             |

**2B. CYP3A4 transcripts with canonical and shorter 3'-UTR**

| Sample Name # | Cq*   | $\Delta Cq$ ^ | $\Delta\Delta Cq$<br>(Minus Undif HepaRG) | Fold of Change<br>(Power) |
|---------------|-------|---------------|-------------------------------------------|---------------------------|
| Undif HepaRG1 | 23.39 | 2.88          | -0.65                                     | 1.57                      |
| Undif HepaRG2 | 25.12 | 4.00          | 0.47                                      | 0.72                      |
| Undif HepaRG3 | 24.68 | 4.02          | 0.49                                      | 0.71                      |
|               |       |               | Mean $\pm$ S.D.                           | 1.0 $\pm$ 0.5             |
| Diff HepaRG1  | 22.42 | 0.51          | -3.02                                     | 8.14                      |
| Diff HepaRG2  | 21.62 | -0.07         | -3.60                                     | 12.14                     |
| Diff HepaRG3  | 21.87 | 0.25          | -3.28                                     | 9.75                      |
|               |       |               | Mean $\pm$ S.D.                           | 10.0 $\pm$ 2.0            |

## 2C. CYP3A4 transcript with intron-6 retention

| Sample#       | Cq*   | $\Delta Cq$ ^ | $\Delta\Delta Cq$<br>(Minus Undif HepaRG) | Fold of Change<br>(Power) |
|---------------|-------|---------------|-------------------------------------------|---------------------------|
| Undif HepaRG1 | 30.61 | 6.90          | 0.65                                      | 0.64                      |
| Undif HepaRG2 | 28.72 | 5.86          | -0.39                                     | 1.31                      |
| Undif HepaRG3 | 28.94 | 6.17          | -0.08                                     | 1.06                      |
|               |       |               | Mean $\pm$ S.D.                           | 1.0 $\pm$ 0.3             |
| Diff HepaRG1  | 27.47 | 3.18          | -3.07                                     | 8.38                      |
| Diff HepaRG2  | 26.05 | 2.43          | -3.82                                     | 14.11                     |
| Diff HepaRG3  | 25.65 | 2.19          | -4.06                                     | 16.73                     |
|               |       |               | Mean $\pm$ S.D.                           | 13.1 $\pm$ 4.3            |

# 1, 2, 3 represents Biological triplicates.

\* Cq values of technical triplicates were averaged.

^ Minus the mean of two reference genes (GAPDH and ACTB).

Undif HepaRG, undifferentiated HepaRG; Diff HepaRG, differentiated HepaRG.

**Supplemental Table 3.** Fold changes of expression of the CYP3A4 mRNA transcripts in HepaRG cells in response to drugs

**3A.** CYP3A4 transcript with canonical 3'-UTR

| Sample Name # | Cq*   | $\Delta Cq$ ^ | $\Delta\Delta Cq$<br>(Minus DMSO) | Fold of Change<br>(Power) |
|---------------|-------|---------------|-----------------------------------|---------------------------|
| DMSO1         | 20.60 | 2.38          | 0.48                              | 0.72                      |
| DMSO2         | 21.61 | 1.54          | -0.36                             | 1.29                      |
| DMSO3         | 21.37 | 1.90          | -0.00                             | 1.00                      |
|               |       |               | Mean $\pm$ S.D.                   | 1.0 $\pm$ 0.3             |
| RIF1          | 18.90 | 1.28          | -0.62                             | 1.53                      |
| RIF2          | 19.70 | 0.88          | -1.02                             | 2.02                      |
| RIF3          | 21.08 | -0.57         | -2.47                             | 5.55                      |
|               |       |               | Mean $\pm$ S.D.                   | 3.0 $\pm$ 2.2             |
| PB1           | 19.41 | 1.38          | -0.52                             | 1.43                      |
| PB2           | 20.87 | 1.50          | -0.40                             | 1.32                      |
| PB3           | 20.01 | 1.33          | -0.57                             | 1.48                      |
|               |       |               | Mean $\pm$ S.D.                   | 1.4 $\pm$ 0.1             |

**3B. CYP3A4 transcripts with canonical and shorter 3'-UTR**

| Sample Name # | Cq*   | $\Delta Cq$ ^ | $\Delta\Delta Cq$<br>(Minus DMSO) | Fold of Change<br>(Power) |
|---------------|-------|---------------|-----------------------------------|---------------------------|
| DMSO1         | 23.88 | 4.07          | -0.95                             | 1.94                      |
| DMSO2         | 26.69 | 6.55          | 1.53                              | 0.35                      |
| DMSO3         | 25.48 | 5.53          | 0.51                              | 0.70                      |
|               |       |               | Mean $\pm$ S.D.                   | 1.0 $\pm$ 0.8             |
| RIF1          | 19.12 | -0.23         | -5.25                             | 38.07                     |
| RIF2          | 21.86 | 0.86          | -4.16                             | 17.86                     |
| RIF3          | 19.73 | 0.18          | -4.84                             | 28.66                     |
|               |       |               | Mean $\pm$ S.D.                   | 28.2 $\pm$ 10.1           |
| PB1           | 19.36 | -0.05         | -5.07                             | 33.70                     |
| PB2           | 20.81 | 0.41          | -4.61                             | 24.39                     |
| PB3           | 20.18 | 0.82          | -4.20                             | 18.34                     |
|               |       |               | Mean $\pm$ S.D.                   | 25.5 $\pm$ 7.7            |

### 3C. CYP3A4 transcript with intron-6 retention

| Sample# | Cq*   | $\Delta Cq^{\wedge}$ | $\Delta\Delta Cq$<br>(Minus DMSO) | Fold of Change<br>(Power) |
|---------|-------|----------------------|-----------------------------------|---------------------------|
| DMSO1   | 28.85 | 8.23                 | -0.40                             | 1.32                      |
| DMSO2   | 31.28 | 8.33                 | -0.30                             | 1.23                      |
| DMSO3   | 30.62 | 9.70                 | 1.07                              | 0.47                      |
|         |       |                      | Mean $\pm$ S.D.                   | 1.0 $\pm$ 0.5             |
| RIF1    | 24.22 | 4.02                 | -4.61                             | 24.34                     |
| RIF2    | 27.67 | 4.01                 | -4.62                             | 24.60                     |
| RIF3    | 25.62 | 4.90                 | -3.73                             | 13.31                     |
|         |       |                      | Mean $\pm$ S.D.                   | 20.8 $\pm$ 6.4            |
| PB1     | 24.71 | 4.43                 | -4.20                             | 18.36                     |
| PB2     | 26.59 | 3.73                 | -4.90                             | 29.84                     |
| PB3     | 26.91 | 6.55                 | -2.08                             | 4.23                      |
|         |       |                      | Mean $\pm$ S.D.                   | 17.5 $\pm$ 12.8           |

# 1, 2, 3 represents Biological triplicates.

\* Cq values of technical triplicates were averaged.

$\wedge$  Minus the mean of two reference genes (GAPDH and ACTB).

DMSO, 0.1% DMSO solvent control; RIF, rifampicin (10  $\mu$ M); PB, phenobarbital (750  $\mu$ M).

**Supplemental Table 4.** Fold changes of expression of the CYP3A4 mRNA transcripts in primary human hepatocytes in response to drugs

**4A.** CYP3A4 transcript with canonical 3'-UTR

| Sample Name # | Cq*   | $\Delta Cq$ ^ | $\Delta\Delta Cq$<br>(Minus DMSO) | Fold of Change<br>(Power) |
|---------------|-------|---------------|-----------------------------------|---------------------------|
| DMSO1         | 19.45 | 2.58          | 0.03                              | 0.98                      |
| DMSO2         | 22.22 | 3.32          | 0.77                              | 0.59                      |
| DMSO3         | 20.96 | 2.02          | -0.53                             | 1.44                      |
|               |       |               | Mean $\pm$ S.D.                   | 1.0 $\pm$ 0.4             |
| RIF1          | 18.78 | 2.01          | -0.54                             | 1.45                      |
| RIF2          | 20.92 | 2.33          | -0.22                             | 1.16                      |
| RIF3          | 19.10 | 0.39          | -2.16                             | 4.45                      |
|               |       |               | Mean $\pm$ S.D.                   | 2.4 $\pm$ 1.8             |
| PB1           | 18.36 | 1.70          | -0.85                             | 1.80                      |
| PB2           | 20.88 | 2.26          | -0.29                             | 1.23                      |
| PB3           | 19.40 | 0.86          | -1.69                             | 3.22                      |
|               |       |               | Mean $\pm$ S.D.                   | 2.1 $\pm$ 1.0             |



**4B. CYP3A4 transcripts with canonical and shorter 3'-UTR**

| Sample Name # | Cq*   | $\Delta Cq$ ^ | $\Delta\Delta Cq$<br>(Minus DMSO) | Fold of Change<br>(Power) |
|---------------|-------|---------------|-----------------------------------|---------------------------|
| DMSO1         | 20.77 | 3.90          | 1.57                              | 0.34                      |
| DMSO2         | 25.18 | 6.27          | 3.94                              | 0.06                      |
| DMSO3         | 19.89 | 0.95          | -1.38                             | 2.61                      |
|               |       |               | Mean $\pm$ S.D.                   | 1.0 $\pm$ 1.4             |
| RIF1          | 17.58 | 0.92          | -1.41                             | 2.66                      |
| RIF2          | 18.79 | 0.20          | -2.13                             | 4.37                      |
| RIF3          | 16.81 | -1.90         | -4.23                             | 18.76                     |
|               |       |               | Mean $\pm$ S.D.                   | 8.6 $\pm$ 8.8             |
| PB1           | 17.44 | 0.67          | -1.66                             | 3.16                      |
| PB2           | 18.86 | 0.23          | -2.10                             | 4.29                      |
| PB3           | 16.93 | -1.60         | -3.93                             | 15.24                     |
|               |       |               | Mean $\pm$ S.D.                   | 7.6 $\pm$ 6.7             |

#### 4C. CYP3A4 transcript with intron-6 retention

| Sample Name # | Cq*   | $\Delta Cq$ ^ | $\Delta\Delta Cq$<br>(Minus DMSO) | Fold of Change<br>(Power) |
|---------------|-------|---------------|-----------------------------------|---------------------------|
| DMSO1         | 25.71 | 8.84          | 0.96                              | 0.51                      |
| DMSO2         | 27.36 | 8.46          | 0.58                              | 0.67                      |
| DMSO3         | 25.95 | 7.01          | -0.87                             | 1.83                      |
|               |       |               | Mean $\pm$ S.D.                   | 1.0 $\pm$ 0.7             |
| RIF1          | 22.47 | 5.71          | -2.17                             | 4.51                      |
| RIF2          | 25.43 | 6.84          | -1.04                             | 2.05                      |
| RIF3          | 24.29 | 5.58          | -2.30                             | 4.92                      |
|               |       |               | Mean $\pm$ S.D.                   | 3.8 $\pm$ 1.6             |
| PB1           | 22.29 | 5.63          | -2.25                             | 4.76                      |
| PB2           | 23.58 | 4.95          | -2.93                             | 7.62                      |
| PB3           | 23.98 | 5.45          | -2.43                             | 5.39                      |
|               |       |               | Mean $\pm$ S.D.                   | 5.9 $\pm$ 1.5             |

# 1, 2, 3 represents Biological triplicates.

\* Cq values of technical triplicates were averaged.

^ Minus the mean of two reference genes (GAPDH and ACTB).

DMSO, 0.1% DMSO solvent control; RIF, rifampicin (10  $\mu$ M); PB, phenobarbital (750  $\mu$ M).

**Supplemental Table 5.** Fold changes of expression of the CYP3A4 mRNA transcripts for human liver samples at different ages.

**5A.** CYP3A4 transcript with canonical 3'-UTR

| Fetal               | Sample No. | EGA # (days)  | Cq*   | $\Delta Cq$ ^ | $\Delta\Delta Cq$ (Minus Fetal) | Fold of Change (Power) |
|---------------------|------------|---------------|-------|---------------|---------------------------------|------------------------|
|                     | 1          | 170           | 20.81 | 2.33          | -0.87                           | 1.83                   |
|                     | 2          | 191           | 22.00 | 3.68          | 0.48                            | 0.72                   |
|                     | 3          | 204           | 21.11 | 3.03          | -0.17                           | 1.13                   |
|                     | 4          | 227           | 22.12 | 4.32          | 1.12                            | 0.46                   |
|                     |            |               |       |               | Mean $\pm$ S.D.                 | 1.0 $\pm$ 0.6          |
| Neonatal /pediatric | Sample No. | PNA # (years) | Cq*   | $\Delta Cq$ ^ | $\Delta\Delta Cq$ (Minus Fetal) | Fold of Change (Power) |
|                     | 1          | 4 days        | 22.35 | 4.81          | 1.61                            | 0.33                   |
|                     | 2          | 3             | 21.00 | 1.31          | -1.89                           | 3.72                   |
|                     | 3          | 4             | 23.84 | 4.55          | 1.35                            | 0.39                   |
|                     | 4          | 7             | 22.40 | 3.84          | 0.64                            | 0.64                   |
|                     |            |               |       |               | Mean $\pm$ S.D.                 | 1.3 $\pm$ 1.6          |
| Adult               | Sample No. | Age (years)   | Cq*   | $\Delta Cq$ ^ | $\Delta\Delta Cq$ (Minus Fetal) | Fold of Change (Power) |
|                     | 1          | 17            | 23.27 | 3.78          | 0.58                            | 0.67                   |
|                     | 2          | 23            | 19.49 | -1.73         | -4.93                           | 30.55                  |
|                     | 3          | 23            | 22.21 | 1.43          | -1.77                           | 3.41                   |
|                     | 4          | 36            | 21.36 | 0.13          | -3.07                           | 8.42                   |
|                     |            |               |       |               | Mean $\pm$ S.D.                 | 10.8 $\pm$ 13.6        |

**5B. CYP3A4 transcripts with canonical and shorter 3'-UTR**

| Fetal | Sample No. | EGA # (days) | Cq*   | $\Delta Cq$ ^ | $\Delta\Delta Cq$ (Minus Fetal) | Fold of Change (Power) |
|-------|------------|--------------|-------|---------------|---------------------------------|------------------------|
|       | 1          | 170          | 24.18 | 5.70          | -0.90                           | 1.87                   |
|       | 2          | 191          | 25.02 | 6.70          | 0.10                            | 0.94                   |
|       | 3          | 204          | 24.49 | 6.41          | -0.19                           | 1.14                   |
|       | 4          | 227          | 27.25 | 9.44          | 2.84                            | 0.14                   |
|       |            |              |       |               | Mean $\pm$ S.D.                 | 1.0 $\pm$ 0.7          |

  

| Neonatal /pediatric | Sample No. | PNA # (years) | Cq*   | $\Delta Cq$ ^ | $\Delta\Delta Cq$ (Minus Fetal) | Fold of Change (Power) |
|---------------------|------------|---------------|-------|---------------|---------------------------------|------------------------|
|                     | 1          | 4 days        | 26.77 | 9.23          | 2.63                            | 0.16                   |
|                     | 2          | 3             | 18.93 | -0.77         | -7.37                           | 165.43                 |
|                     | 3          | 4             | 23.59 | 4.29          | -2.31                           | 4.94                   |
|                     | 4          | 7             | 19.99 | 1.43          | -5.17                           | 35.94                  |
|                     |            |               |       |               | Mean $\pm$ S.D.                 | 51.6 $\pm$ 77.5        |

  

| Adult | Sample No. | Age (years) | Cq*   | $\Delta Cq$ ^ | $\Delta\Delta Cq$ (Minus Fetal) | Fold of Change (Power) |
|-------|------------|-------------|-------|---------------|---------------------------------|------------------------|
|       | 1          | 17          | 22.11 | 2.61          | -3.99                           | 15.93                  |
|       | 2          | 23          | 19.99 | -1.23         | -7.83                           | 228.24                 |
|       | 3          | 23          | 19.97 | -0.81         | -7.41                           | 169.61                 |
|       | 4          | 36          | 20.59 | -0.64         | -7.24                           | 151.50                 |
|       |            |             |       |               | Mean $\pm$ S.D.                 | 141.3 $\pm$ 89.8       |

### 5C. CYP3A4 transcript with intron-6 retention

| Fetal               | Sample No. | EGA # (days)  | Cq*   | $\Delta Cq$ ^ | $\Delta\Delta Cq$ (Minus Fetal) | Fold of Change (Power) |
|---------------------|------------|---------------|-------|---------------|---------------------------------|------------------------|
|                     | 1          | 170           | 23.51 | 5.03          | -0.37                           | 1.30                   |
|                     | 2          | 191           | 23.80 | 5.48          | 0.08                            | 0.95                   |
|                     | 3          | 204           | 22.68 | 4.60          | -0.80                           | 1.74                   |
|                     | 4          | 227           | 27.63 | 9.82          | 4.42                            | 0.05                   |
|                     |            |               |       |               | Mean $\pm$ S.D.                 | 1.0 $\pm$ 0.7          |
| Neonatal /pediatric | Sample No. | PNA # (years) | Cq*   | $\Delta Cq$ ^ | $\Delta\Delta Cq$ (Minus Fetal) | Fold of Change (Power) |
|                     | 1          | 4 days        | 24.40 | 6.86          | 1.46                            | 0.36                   |
|                     | 2          | 3             | 25.24 | 5.55          | 0.15                            | 0.90                   |
|                     | 3          | 4             | 30.57 | 11.27         | 5.87                            | 0.02                   |
|                     | 4          | 7             | 25.98 | 7.43          | 2.03                            | 0.25                   |
|                     |            |               |       |               | Mean $\pm$ S.D.                 | 0.4 $\pm$ 0.4          |
| Adult               | Sample No. | Age (years)   | Cq*   | $\Delta Cq$ ^ | $\Delta\Delta Cq$ (Minus Fetal) | Fold of Change (Power) |
|                     | 1          | 17            | 30.39 | 10.89         | 5.49                            | 0.02                   |
|                     | 2          | 23            | 26.19 | 4.96          | -0.44                           | 1.35                   |
|                     | 3          | 23            | 23.36 | 2.59          | -2.81                           | 7.02                   |
|                     | 4          | 36            | 25.43 | 4.20          | -1.20                           | 2.29                   |
|                     |            |               |       |               | Mean $\pm$ S.D.                 | 2.7 $\pm$ 3.0          |

# EGA, estimated gestational age; PNA, postnatal age.

\* Cq values of technical triplicates were averaged.

^ Minus the mean of two reference genes (GAPDH and ACTB).
