# Supplementary material
Source: PubMed Central journal article supplement (PMC3250109)
Supplement: supp_mol.111.074393_SFig_1_74393.pdf [file supp_mol.111.074393_SFig_1_74393.pdf]

# The role of CYP3A4 mRNA transcript with shortened 3'-UTR in hepatocyte differentiation, liver development, and response to drug induction

Dan Li, Roger Gaedigk, Steven N. Hart, J Steven Leeder, and Xiao-bo Zhong  
Molecular Pharmacology

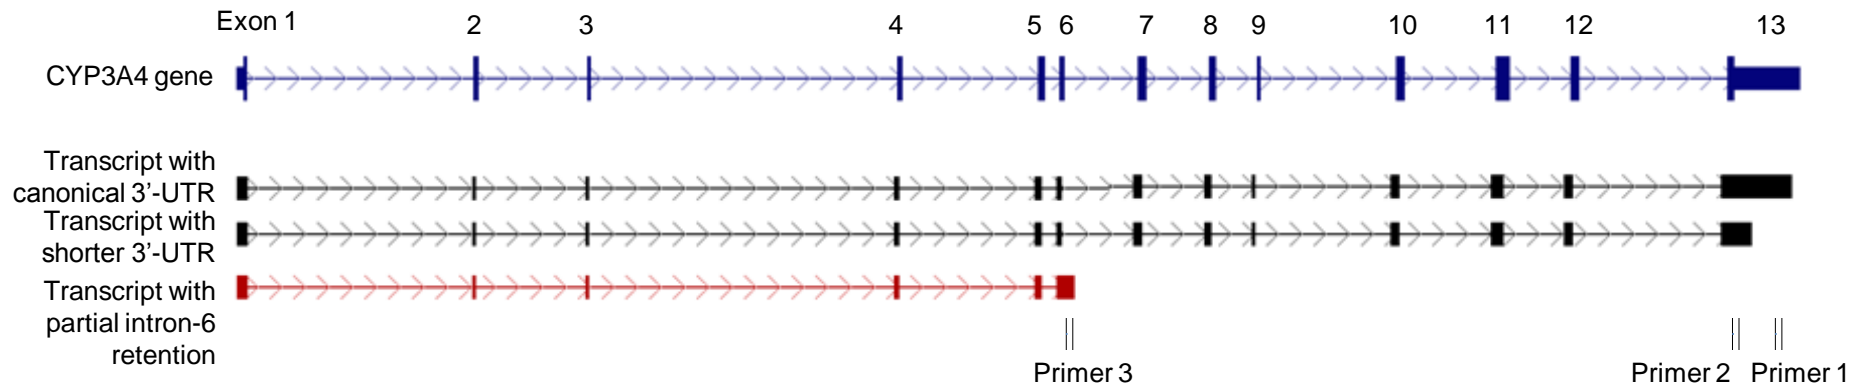

Primer 1, transcript with canonical 3'-UTR, PCR product: 142 bps  
Primer 2, transcripts with canonical and shorter 3'-UTR, PCR product: 156 bps  
Primer 3, transcript with intron-6 retention, PCR product: 85 bps

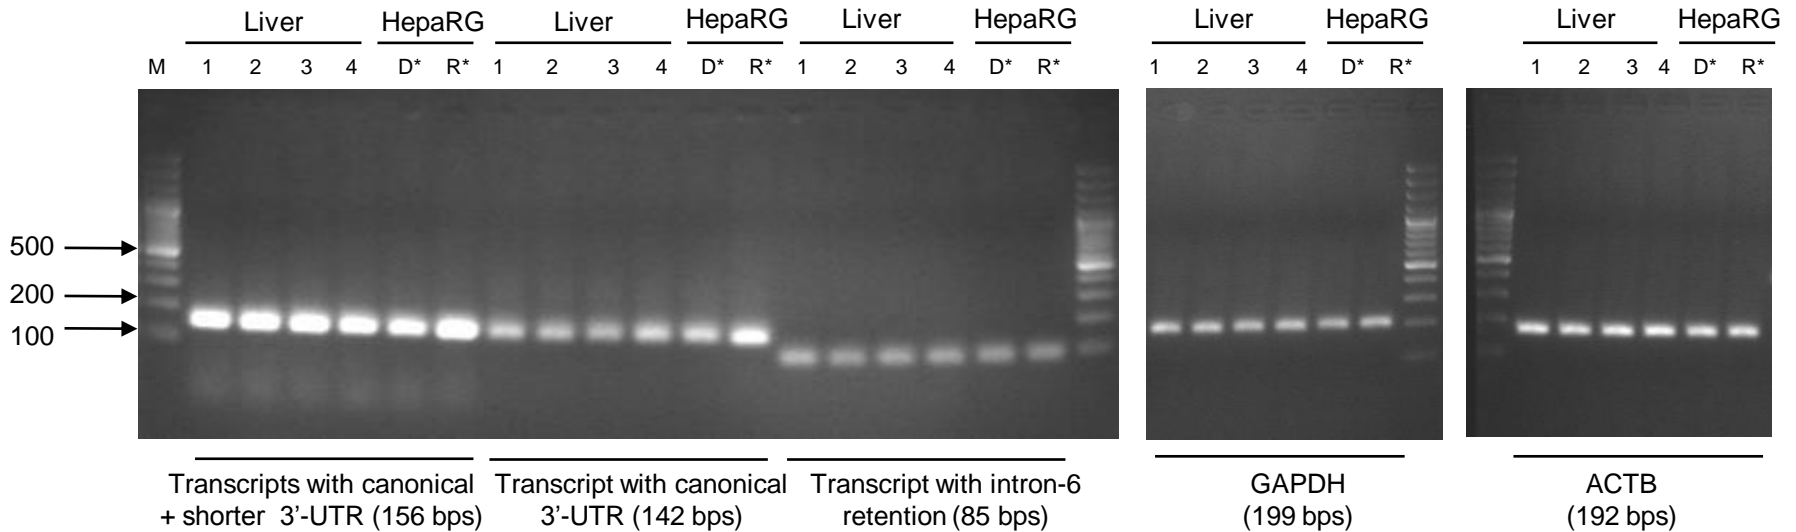

**Supplemental Fig. 1.** Design and validation of primer sets for quantification of the CYP3A4 mRNA transcripts by real-time PCR. \*D: HepaRG cell treated with DMSO, R: HepaRG cells treated with rifampicin. M: DNA marker.
