# Supplementary material
Source: PubMed Central journal article supplement (PMC3250109)
Supplement: supp_mol.111.074393_SFig_2A_74393.pdf [file supp_mol.111.074393_SFig_2A_74393.pdf]

# The role of CYP3A4 mRNA transcript with shortened 3'-UTR in hepatocyte differentiation, liver development, and response to drug induction

Dan Li, Roger Gaedigk, Steven N. Hart, J Steven Leeder, and Xiao-bo Zhong  
Molecular Pharmacology

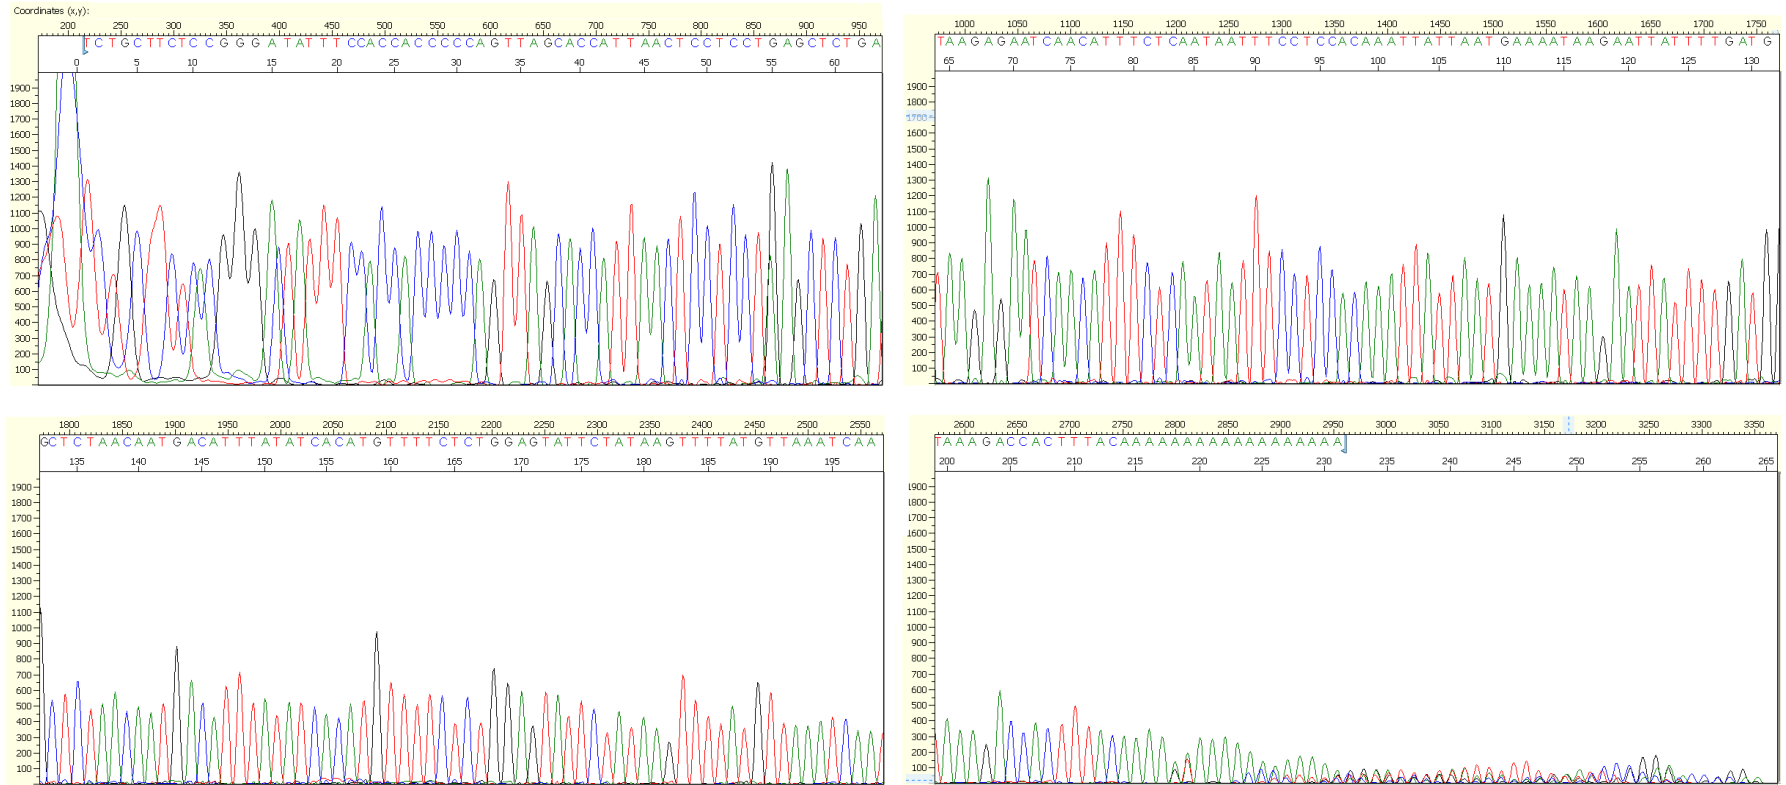

**Supplemental Fig. 2A.** Sequencing results of the shorter 3'-UTR transcript from the 3'RACE-PCR product.
