# Supplementary material
Source: PubMed Central journal article supplement (PMC3250109)
Supplement: supp_mol.111.074393_SFig_4_74393.pdf [file supp_mol.111.074393_SFig_4_74393.pdf]

The role of CYP3A4 mRNA transcript with shortened 3'-UTR in hepatocyte differentiation, liver development, and response to drug induction

Dan Li, Roger Gaedigk, Steven N. Hart, J Steven Leeder, and Xiao-bo Zhong  
Molecular Pharmacology

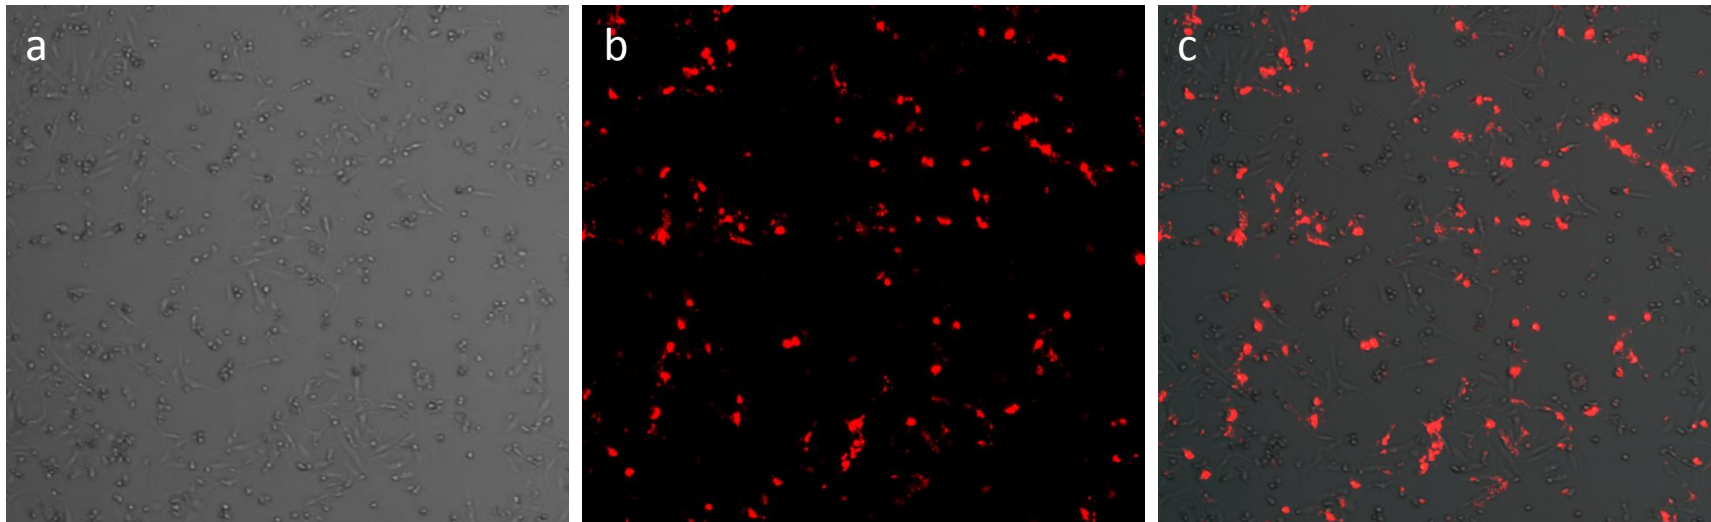

**Supplemental Fig. 4.** Transfection efficiency (mean: 14.2%; 95% CI: 11.7% -16.7%) measured by red fluorescence protein (RFP) expression with CYP3A4 3'-UTR pMirTarget plasmids. The expression of RFP was analyzed *in situ* on an adherent cell cytometer (Celigo™ Cytometer) to obtain cell images in both bright field and red fluorescence. **a.** Bright image. **b.** Red fluorescence image. **c.** Overlap of both bright field and red fluorescence images. The ratios of cell densities from bright field to red fluorescence in each entire well were analyzed by Celigo Software and used for normalization of transfection efficiency.
